# Supplementary material for: Synthesis of an elongated linear oligo(phenylene ethynylene)-based building block for application in DNA-programmed assembly
Source: Royal Society of Chemistry journal article supplement (doi:10.1039/b605844b), 2006-01-01
Supplement: b605844b.pdf [file b605844b.pdf]

## Synthesis of an elongated linear oligo(phenylene ethynylene)-based building block for application in DNA-programmed assembly

Peter Blakskjær<sup>ab</sup> and Kurt V. Gothelf<sup>a</sup>

### HPLC analyses of ELOM 11, 12 and 13.

The analyses were performed on a Hewlett Packard Agilent 1100 Series using a Waters XTerra MS C18 2.5 $\mu$ m 4.6x50mm column. The following conditions were applied: T=60°C, flow= 0.5 mL/min, MeCN / triethylammonium Acetate, 0.1 M, pH 7, in water.

The chromatogram are displayed at 260 nm (Injected Vol= 60  $\mu$ L, approximately, ~20 pmol). The UV-absorption spectra of the major peaks (rt = ca 23.7 min) are shown below the chromatogram. The adsorption peak at 260 nm corresponds to DNA and the peak at 390 nm corresponds to the ELM chromophore.

#### HPLC Chromatogram of LOM11

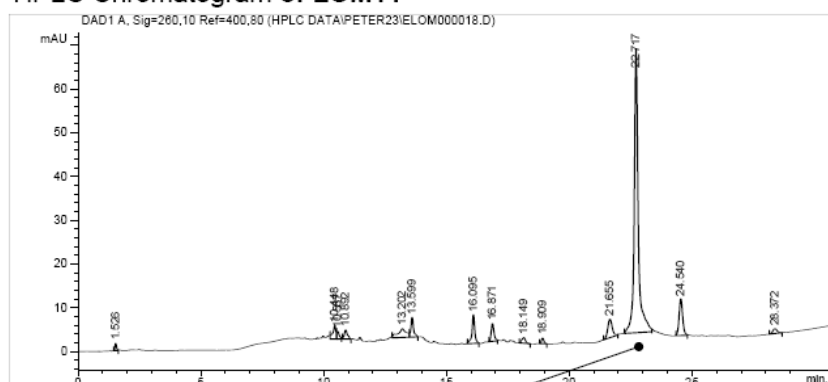

#### UV spectrum of LOM11

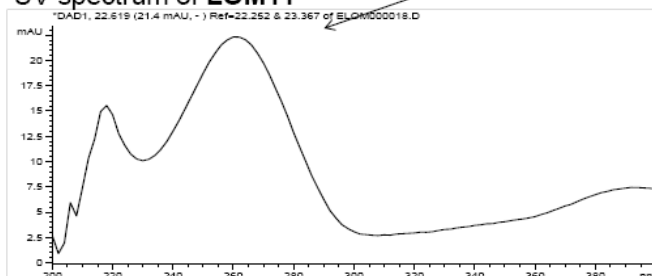

Fig. S1. HPLC Chromatogram of ELOM 11 at 260 nm and UV spectrum of the major peak.

<sup>a</sup> Center for Catalysis and Interdisciplinary Nanoscience Center (iNANO), Department of Chemistry, University of Aarhus, Langelandsgade 140, E-mail: kvg@chem.au.dk; Fax: +45 86196199; Tel: +45 89423907

<sup>b</sup> Vipergen, Fruebjergvej 3, DK-2100, Copenhagen OE, Denmark

# SUPPLEMENTARY INFORMATION

## HPLC Chromatogram of LOM12

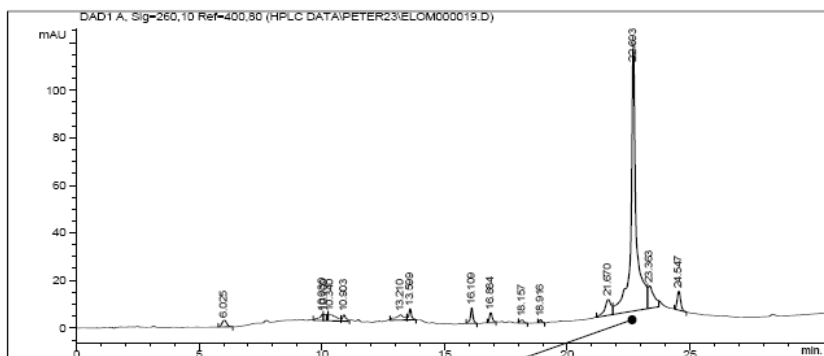

## UV spectrum of LOM12

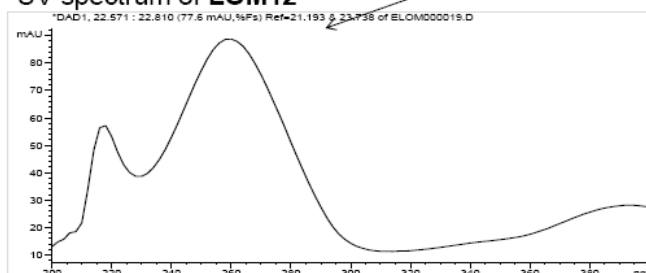

Fig. S2 HPLC Chromatogram of ELOM 12 at 260 nm and UV spectrum of the major peak.

## HPLC Chromatogram of LOM13

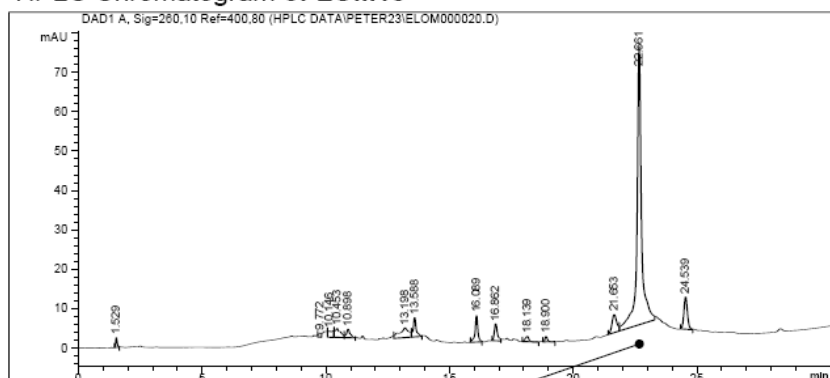

## UV spectrum of LOM13

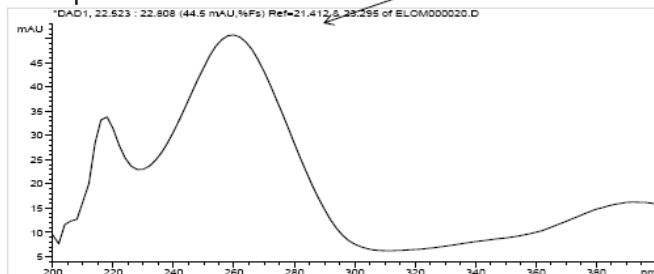

Fig S3 HPLC Chromatogram of ELOM 13 at 260 nm and UV spectrum of the major peak.
